# Supplementary figures and images for: Activity of mevalonate pathway inhibitors against breast and ovarian cancers in the ATP-based tumour chemosensitivity assay
Source: Springer Nature journal article supplement (doi:10.1186/1471-2407-9-38), 2009-01-28

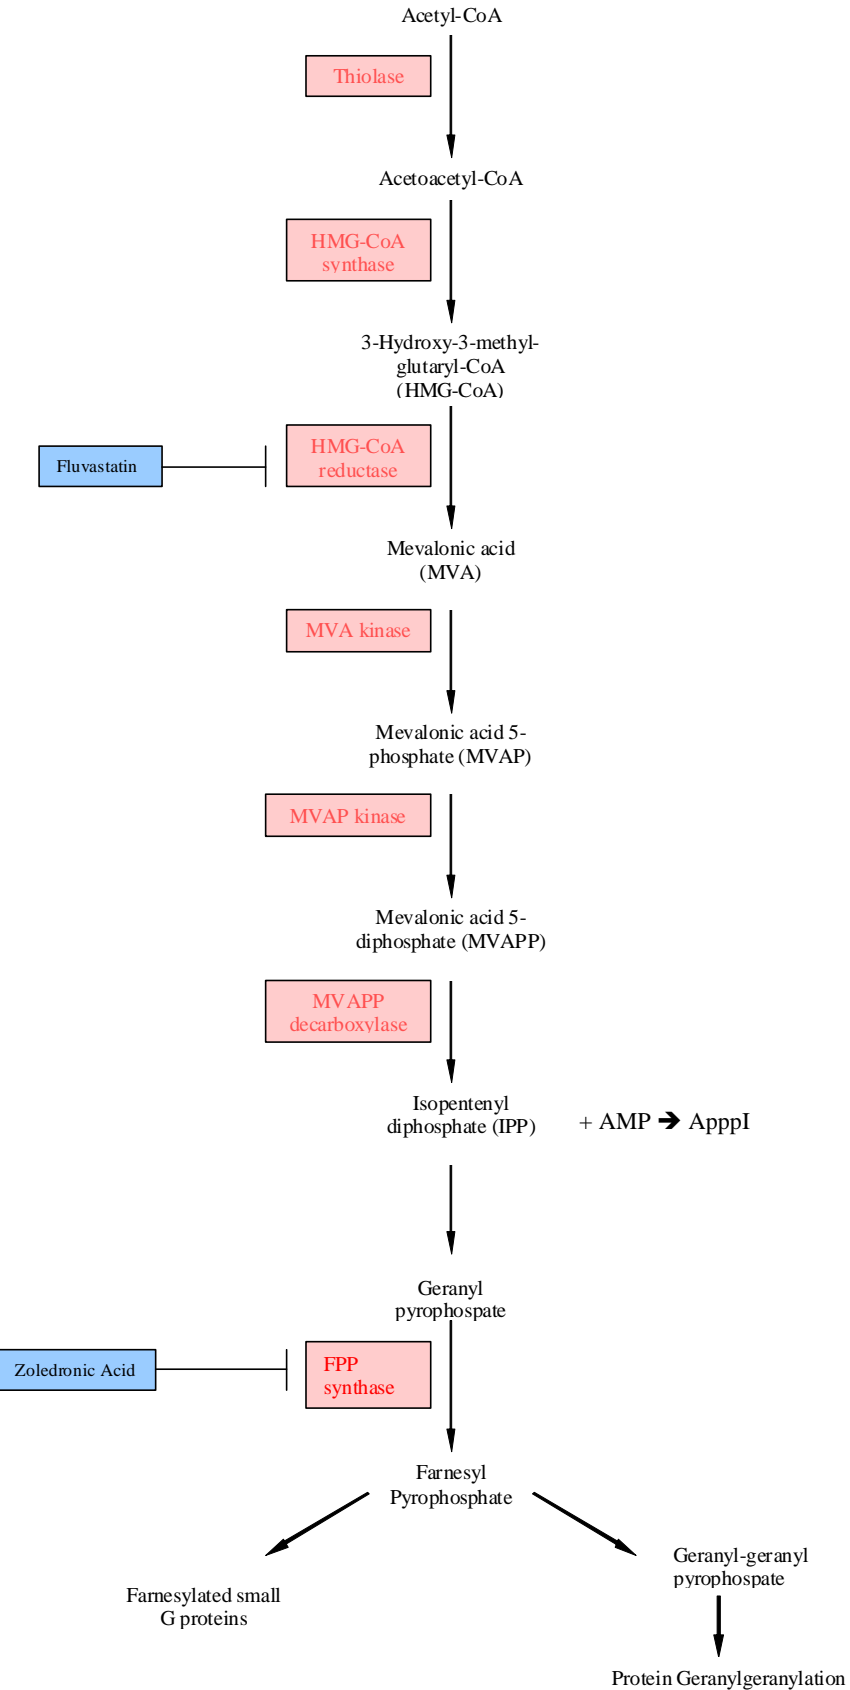

Supplement: 12885_2008_1372_MOESM1_ESM.pdf [file 12885_2008_1372_MOESM1_ESM.pdf]

a)

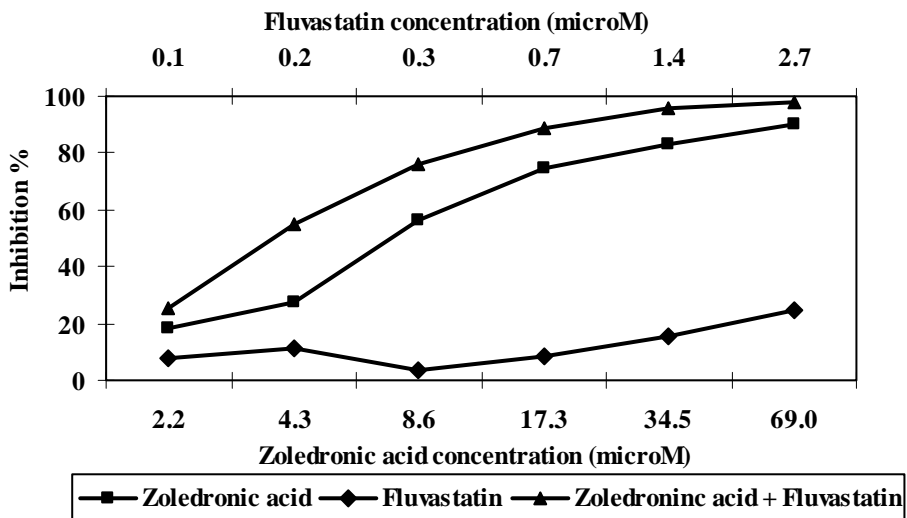

b)

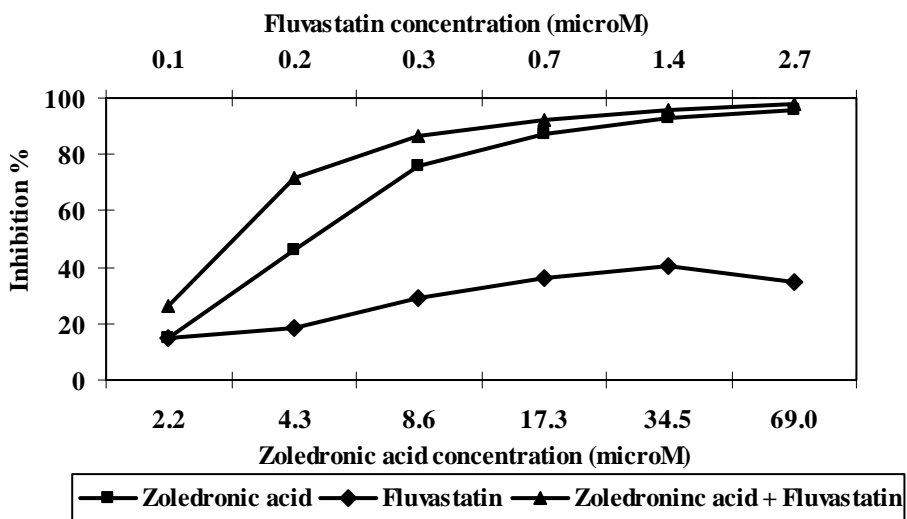

c)

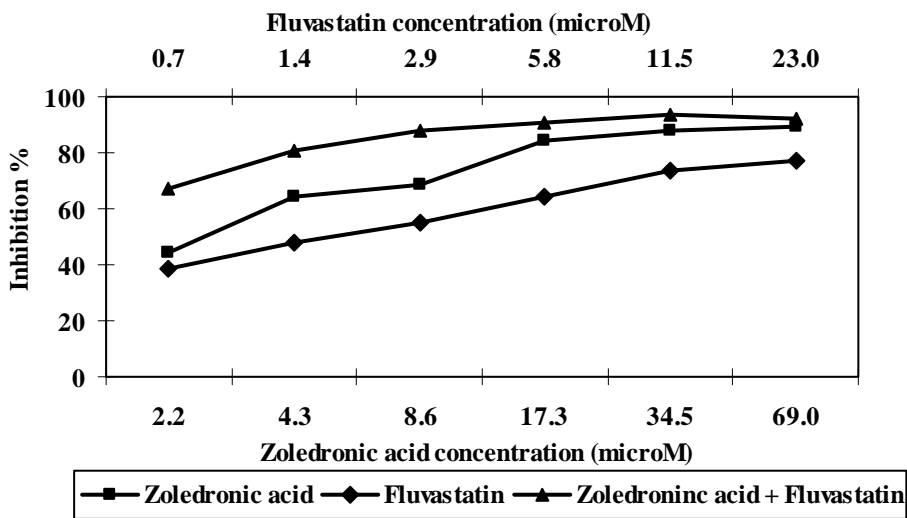

Supplement: 12885_2008_1372_MOESM2_ESM.pdf [file 12885_2008_1372_MOESM2_ESM.pdf]

a)

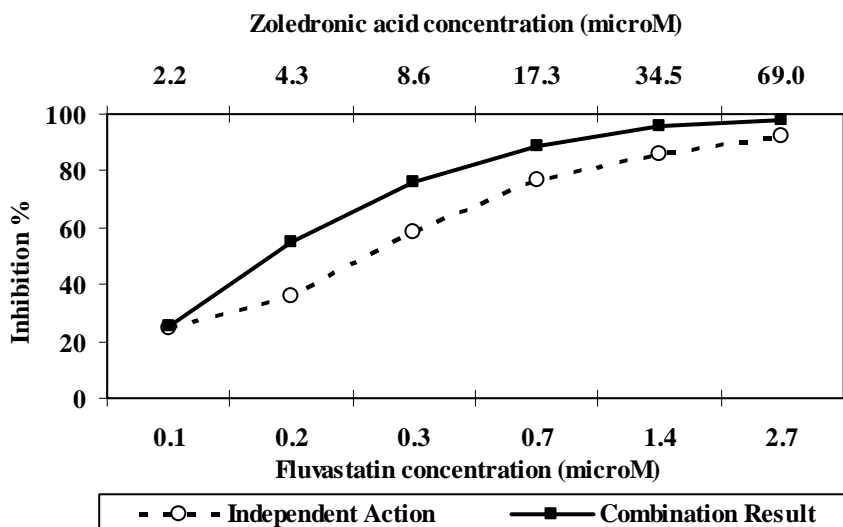

b)

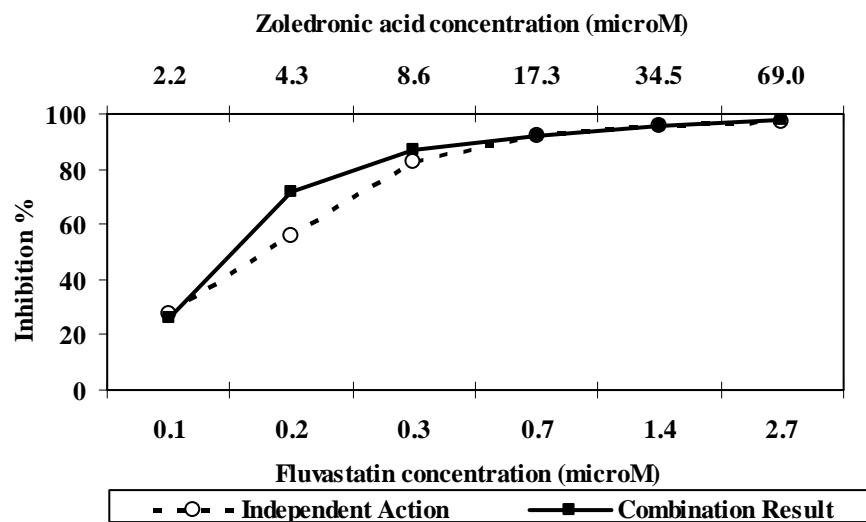

c)

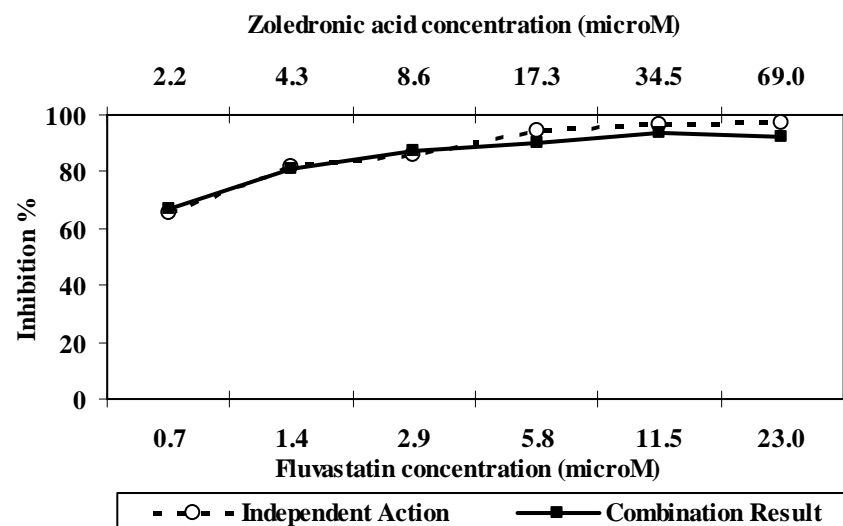

Supplement: 12885_2008_1372_MOESM3_ESM.pdf [file 12885_2008_1372_MOESM3_ESM.pdf]

a)

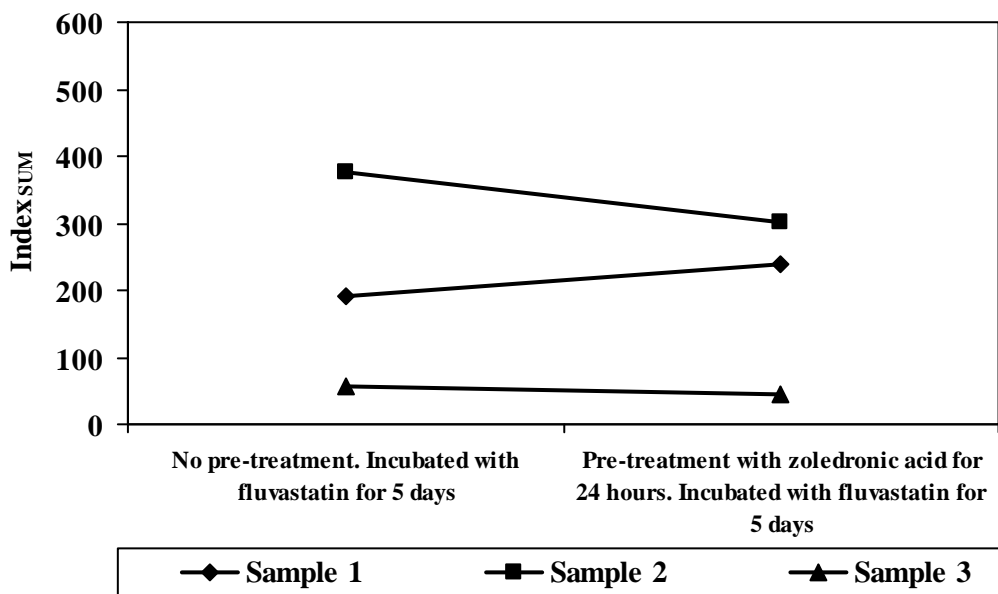

b)

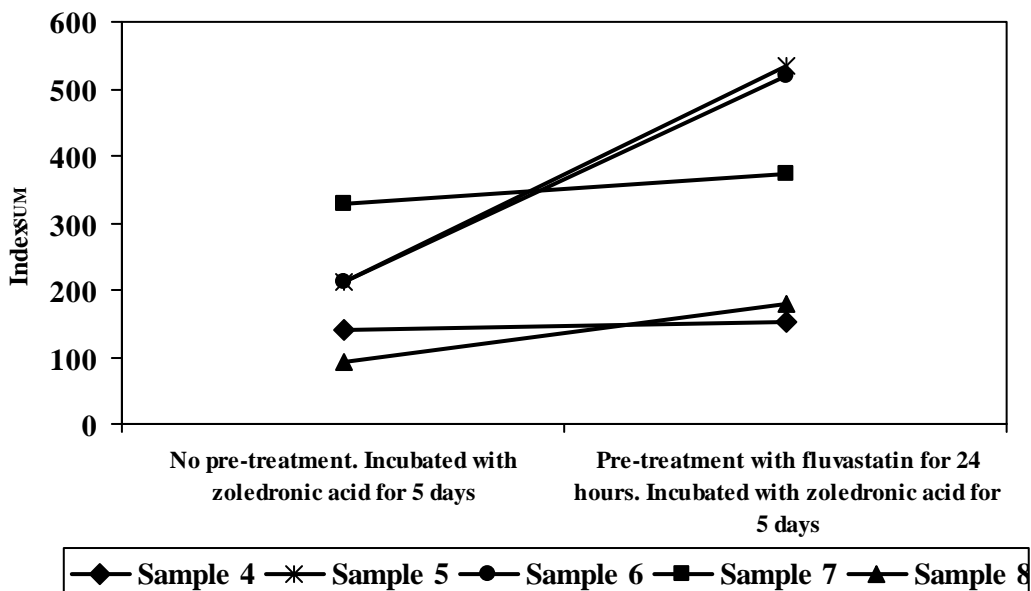

Supplement: 12885_2008_1372_MOESM4_ESM.pdf [file 12885_2008_1372_MOESM4_ESM.pdf]

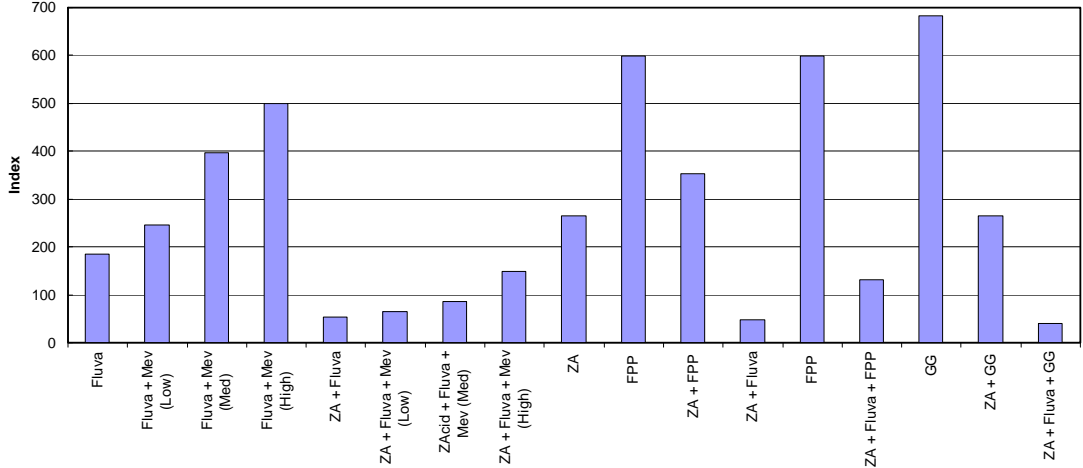

Supplement: 12885_2008_1372_MOESM5_ESM.pdf [file 12885_2008_1372_MOESM5_ESM.pdf]
